# Supplementary material
Source: PubMed Central journal article supplement (PMC1691049)

This is an electronic appendix to the paper by Fuller 2002 Lighting environment predicts the relative abundance of male colour morphs in bluefin killerfish (*Lucania goodei*) populations. *Proc. R. Soc. Lond. B* **269**, 1457-1465.

Electronic appendices are refereed with the text. However, no attempt has been made to impose a uniform editorial style on the electronic appendices.

### Electronic Appendix A.

Figure A1.

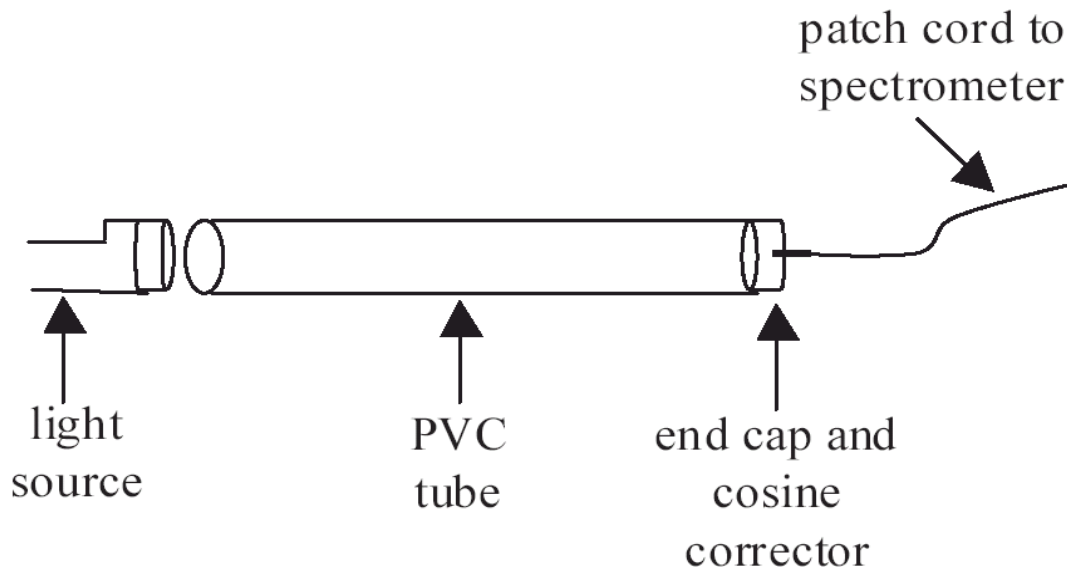

Figure A2a

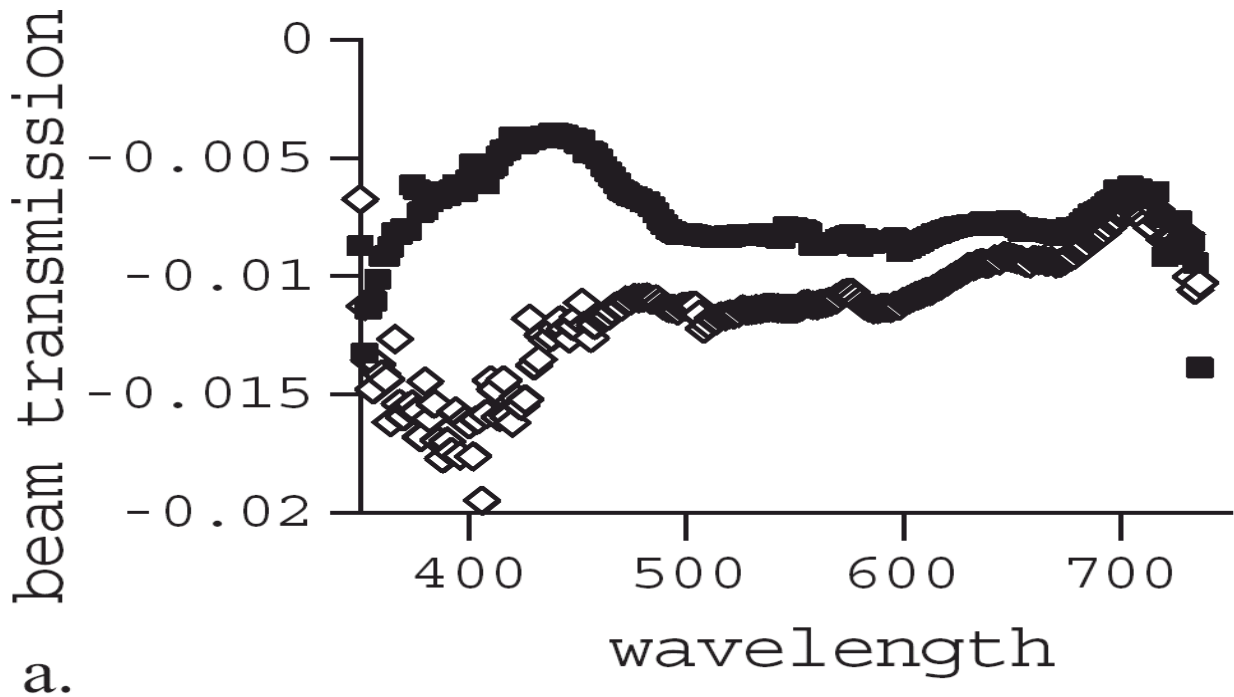

Figure A2b

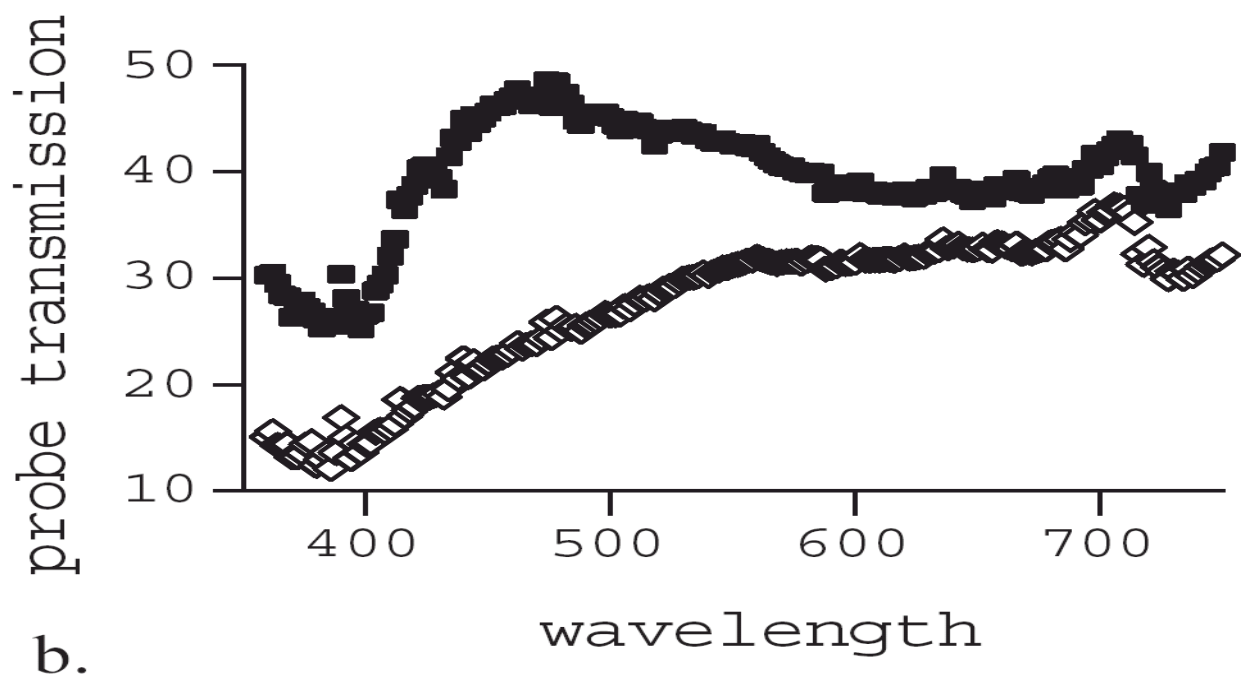

Figure A3

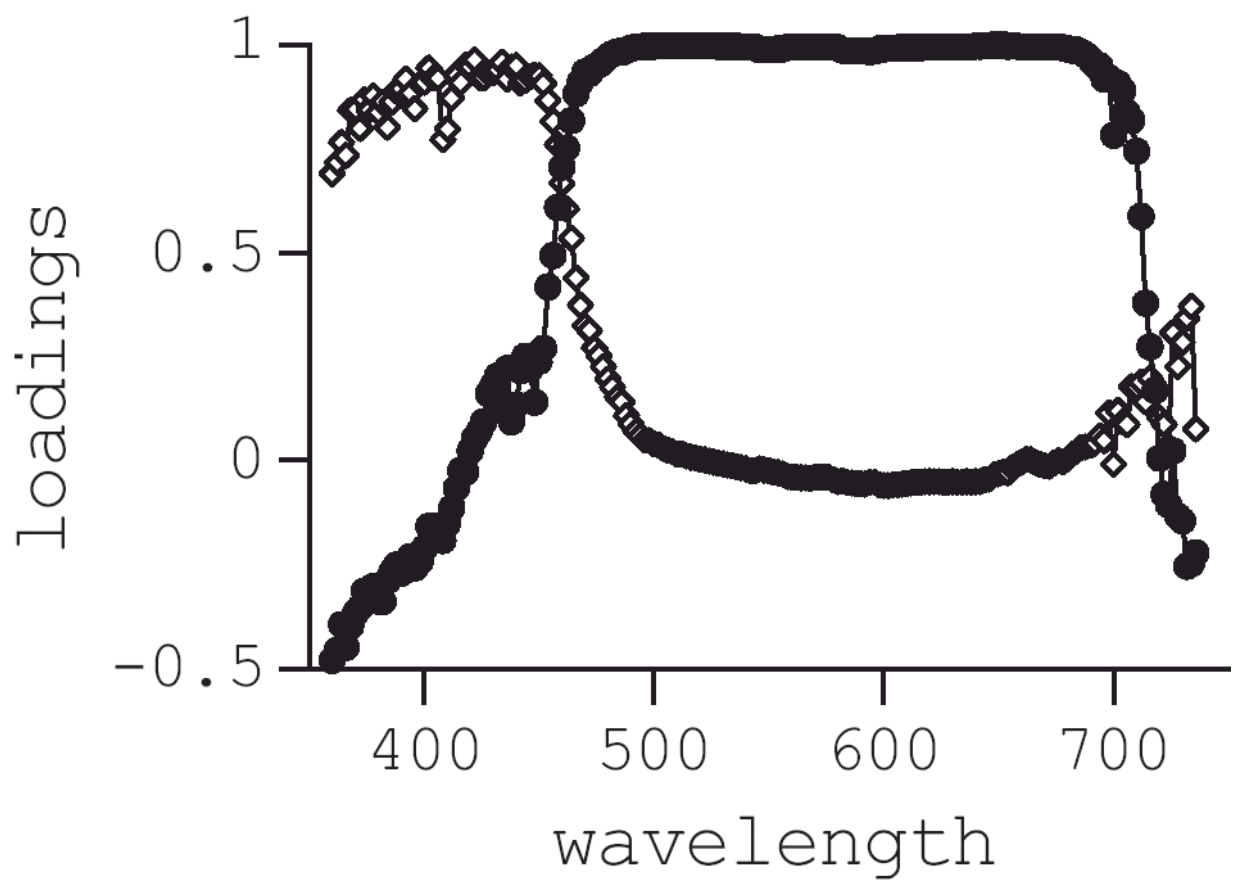

Supplement: 12137575s01.pdf [file 12137575s01.pdf]
